# Supplementary material for: Helical and network coordination polymers based on a novel C2-symmetric ligand : SHG enhancement through specific metal coordinationElectronic supplementary information (ESI) available: experimental, crystallographic and computational details. See http://www.rsc.org/suppdata/cc/b3/b316931f/
Source: Royal Society of Chemistry journal article supplement (doi:10.1039/b316931f), 2004-01-01
Supplement: b316931f.doc [file b316931f.doc]

***Supplementary Information for***

**Helical and Network Coordination Polymers Based on a Novel C2-symmetric Ligand : SHG Enhancement through Specific Metal Coordination**

S. Philip Anthony and T. P. Radhakrishnan*

School of Chemistry, University of Hyderabad

Hyderabad – 500 046, INDIA

***Contents***

**Page 2** Synthesis & Characterization of BCDC, [Cu(BCDC)]PF6 and [Ag(BCDC)]ClO4.

Second harmonic generation measurement details and data.

Crystal structure determination details.

**Pages 3-5** Crystal structure figures and tables - BCDC.H2O.

**Pages 6-9** Crystal structure figures and tables - [Cu(BCDC)]PF6.THF.

**Pages 10-16** Crystal structure figures and tables - [Ag(BCDC)]ClO4.

**Pages 17-20** Computational details.

**Synthesis and Characterization**

**N,N' bis-(4-cyanophenyl)-(1*R*,2*R*)-diaminocyclohexane (BCDC)**. 0.37 g (3.2 mmol) of (1*R*, 2*R*)-diaminocyclohexane was dissolved in 5 ml DMSO; 2 g K2CO3 and 1 g (8.2 mmol) of 4-fluorobenzonitrile were added. The mixture was stirred at 140oC for 10 h, cooled to 30oC and poured into ice-water with vigrous stirring. The precipitate formed was filtered and washed with ice-cold water. The crude product was purified by column chromatography (neutral alumina; ethyl acetate/hexane 20:80). Yield : 0.6 g (60%).

M.P./oC = 150; FT-IR (KBr) : /cm-1 = 3335.2, 2212.6, 1604.9, 1520.0; 1H-NMR (CDCl3) : /ppm = 1.20-1.80 (m, 6H), 2.29 (d, 2H), 3.32-3.79 (m, 2H), 4.46-4.52 (m, 2H), 6.55 (d, 4H), 7.29 (d, 4H); 13C-NMR (CDCl3) : /ppm = 24.46, 32.25, 56.59, 98.50, 112.54, 120.50, 133.71, 150.74; UV-Vis (Acetonitrile solution) max/nm = 216.2, 293.4.

**[Cu(BCDC)]PF6.THF**. 0.08 g (0.26 mmol) of BCDC in THF was layered on a solution of 0.1 g (0.26 mmol) of [Cu(CH3CN)4]PF6 in dry dichloromethane. Colorless crystals formed in about 48 h. The solution was decanted and the crystals were washed with dichloromethane and THF and dried. Yield : 0.13 g (80%).

M.P./oC = 205 (dec); FT-IR (KBr): /cm-1 = 3414.3, 2243.4, 1597.2,1506.5, 843.0; UV-Vis (Solid pellet; reflectance mode) : max/nm = 275.6, 362.2 (cut-off (in text) is defined as wavelength where the large and negative slope reduced to <0.01).

**[Ag(BCDC)]ClO4**. 0.05 g (0.22 mmol) of AgClO4.H2O dissolved in 5 ml of acetone was added to a solution of 0.07 g (0.22 mmol) of BCDC in 5 ml of acetone. The mixture was stirred for 5 min at 30oC and the white product obtained was filtered, washed with acetone and dried. Yield : 0.1 g (90%). Crystals obtained by slow evaporation of acetonitrile solution.

M.P./oC = 195 (dec); FT-IR (KBr) : /cm-1 = 3352.6, 2247.3, 1599.1, 1523.9, 1074.5; UV-Vis (Solid pellet; reflectance mode) max/nm = 263.4, 348.6.

**Second Harmonic Generation Study**

Second harmonic generation from microcrystalline powders were examined using the Kurtz-Perry method. Particle sizes were graded using standard sieves; sizes from 100-300 m were studied. Samples were loaded in glass capillaries having an inner diameter of 600 m. Fundamental beam (1064 nm) of a Q-switched ns-pulsed (6 ns, 10 Hz) Nd:YAG laser (Spetra Physics Model INDI-40) was used. The second harmonic signal was collected using appropriate optics and detected using a monochromator, PMT and oscilloscope (Tektronix Model TDS 210, 60 MHz). Filters were as needed, to bring the signals for all the samples in the same range. Microcrystalline urea with particle size > 150 m was used as the reference. In the following table, U is the SHG of urea.

| **Particle size (m**) | **SHG / U** | | |
| --- | --- | --- | --- |
| **BCDC.H2O** | **[Cu(BCDC)PF6]THF** | **[Ag(BCDC)]ClO4** |
| 100-150 | 0.21 | 0.19 | 2.4 |
| 150-200 | 0.22 | 0.18 | 2.4 |
| 200-250 | 0.19 | 0.22 | 2.5 |
| 250-300 | 0.28 | 0.20 | 2.9 |

**Crystal Structure Determination**

Single crystal x-ray data were measured on an ENRAF-NONIUS MACH3 diffractometer. MoK ( = 0.71073 Å) radiation with a graphite crystal monochromator in the incident beam was used. The standard CAD4 centering, indexing and data collection programs were used. The unit cell dimensions were obtained by a least-squares fit of 24 centered reflections near  = 10o. Intensity data were collected using the  scan method at a scan speed of 2.75 or 4.12 o/min. The scan width,  for each reflection was [0.80 + 0.35 tan]. During data collection the intensities of three standard reflections were monitored every 1.5 h; no decay was observed. Three orientation standards were monitored every 250 reflections to monitor crystal motion. Data was reduced using Xtal3.4; intensities were corrected for Lorentz and polarization effects. Empirical absorption correction using the psi-scan method was employed in the case of the two metal complexes. Non H atoms were found using the SHELXS-97 direct method analysis and were refined anisotropically. H atoms were added at idealized positions for structure factor calculation, but were not refined. All computations were carried out on a Pentium PC using SHELXL-97. In the case of BCDC.H2O, the H atoms of the water molecule were constrained by DFIX and DANG controls in the SHELX refinement. Refinement proceeded to convergence by minimizing w(Fo2-Fc2). A final difference Fourier synthesis map showed the largest difference peak and hole to be very small. The R indices are calculated as R=(Fo-Fc)/Fo and wR2=[w(Fo2-Fc2)2/(Fo2)2]1/2. The crystallographic data are provided in the tables on the following pages.

**BCDC.H2O**

**
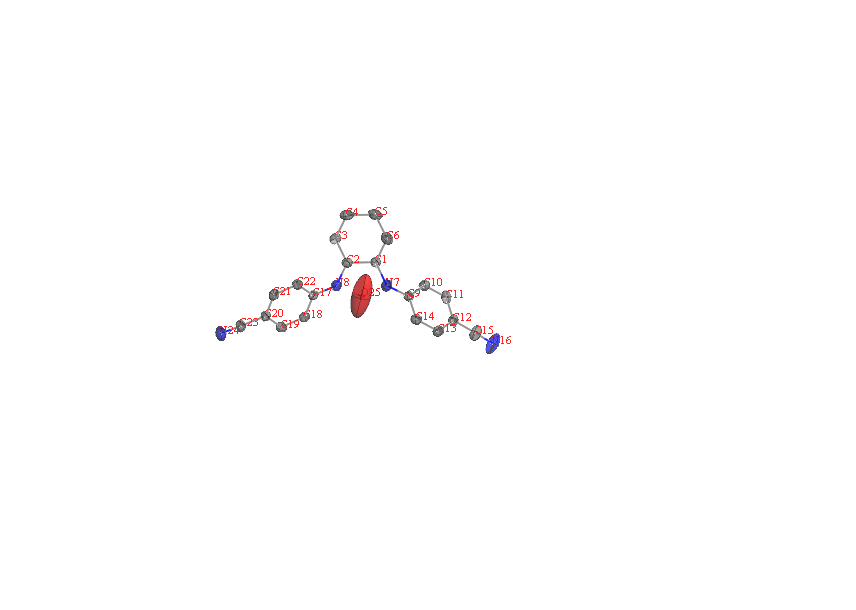
**

**Table 1**. Detailed crystallographic data for **BCDC.H2O**.

| Molecular formula | C20H22N4O |
| --- | --- |
| Formula weight | 334.42 |
| Crystal system | Orthorhombic |
| Space group | P212121 (No. 19) |
| Color and appearance | Colorless, cuboid |
| Dimensions, mm x mm x mm | 0.76 x 0.56 x 0.40 |
| a / Å | 7.886(3) |
| b / Å | 15.27(3) |
| c / Å | 15.765(9) |
| V / Å3 | 1898(4) |
| F(000) | 712 |
| Z | 4 |
| calc. / g cm-3 | 1.170 |
| , cm-1 | 0.70 |
| Temperature / K | 293(2) |
|  / Å | 0.71703 |
|  range / deg. | 1.86-30.96 |
| Index ranges | -11h11, -22k22, -22l22 |
| No. reflections collected/unique | 3431/3405 [Rint = 0.0000] |
| Completeness to 2=30.96 | 99.9% |
| Refinement method | Full-matrix least-squareso n F2 |
| No. of reflections with I  2I | 1520 |
| No. of restraints, parameters | 3, 242 |
| Goodness-of-fit on F2 | 1.026 |
| R [for I  2I] | 0.0535 |
| wR2[for I  2I] | 0.1204 |
| R [all data] | 0.1205 |
| wR2 [all data] | 0.1635 |
| Absolute Structure Parameter (Flack) | 0.00 |
| Largest difference peak /e Å-3 | 0.16 |
| Largest difference hole /e Å-3 | -0.23 |

**Table 2**. Atomic coordinates ( x 104) and equivalent isotropic displacement parameters (Å2 x 103) for **BCDC.H2O**. Ueq is defined as one third of the trace of the orthogonalized Uij tensor.

|  | **x** | **y** | **z** | **Ueq** |
| --- | --- | --- | --- | --- |
| N(7) | 6350(3) | 5350(1) | 561(2) | 63(1) |
| N(8) | 8452(3) | 3947(1) | 1015(1) | 59(1) |
| N(16) | 6598(5) | 9690(2) | 1335(3) | 129(2) |
| N(24) | 9075(5) | 528(2) | 3707(2) | 90(1) |
| O(25) | 3613(11) | 4140(4) | 1239(8) | 447(9) |
| C(1) | 7273(4) | 4880(2) | -98(2) | 51(1) |
| C(2) | 7599(4) | 3943(2) | 198(2) | 49(1) |
| C(3) | 8598(4) | 3447(2) | -480(2) | 61(1) |
| C(4) | 7687(6) | 3453(2) | -1327(2) | 77(1) |
| C(5) | 7342(6) | 4379(2) | -1617(2) | 83(1) |
| C(6) | 6344(5) | 4876(2) | -946(2) | 71(1) |
| C(9) | 6384(4) | 6238(2) | 683(2) | 50(1) |
| C(10) | 7270(4) | 6812(2) | 148(2) | 58(1) |
| C(11) | 7288(4) | 7696(2) | 303(2) | 63(1) |
| C(12) | 6436(4) | 8047(2) | 997(2) | 57(1) |
| C(13) | 5517(4) | 7483(2) | 1523(2) | 61(1) |
| C(14) | 5507(4) | 6601(2) | 1371(2) | 59(1) |
| C(15) | 6514(5) | 8962(2) | 1173(3) | 82(1) |
| C(17) | 8529(4) | 3259(2) | 1556(2) | 47(1) |
| C(18) | 9468(4) | 3328(2) | 2318(2) | 55(1) |
| C(19) | 9583(4) | 2648(2) | 2870(2) | 57(1) |
| C(20) | 8777(4) | 1856(2) | 2700(2) | 52(1) |
| C(21) | 7840(4) | 1773(2) | 1962(2) | 57(1) |
| C(22) | 7703(4) | 2458(2) | 1402(2) | 53(1) |
| C(23) | 8942(4) | 1120(2) | 3263(2) | 65(1) |

**Table 3**. Bond lengths [Å] and angles [o] for **BCDC.H2O**.

| **Bond / Bonds** | **Distance/angle** |
| --- | --- |
| N(7)-C(9) | 1.369(4) |
| N(7)-C(1) | 1.457(4) |
| N(8)-C(17) | 1.354(4) |
| N(8)-C(2) | 1.453(3) |
| N(16)-C(15) | 1.142(4) |
| N(24)-C(23) | 1.148(4) |
| C(1)-C(6) | 1.525(4) |
| C(1)-C(2) | 1.527(4) |
| C(2)-C(3) | 1.529(4) |
| C(3)-C(4) | 1.517(4) |
| C(4)-C(5) | 1.511(5) |
| C(5)-C(6) | 1.521(5) |
| C(9)-C(14) | 1.401(4) |
| C(9)-C(10) | 1.402(4) |
| C(10)-C(11) | 1.372(4) |
| C(11)-C(12) | 1.391(4) |
| C(12)-C(13) | 1.398(4) |
| C(12)-C(15) | 1.427(5) |
| C(13)-C(14) | 1.368(5) |
| C(17)-C(22) | 1.407(4) |
| C(17)-C(18) | 1.416(4) |
| C(18)-C(19) | 1.358(4) |
| C(19)-C(20) | 1.393(4) |
| C(20)-C(21) | 1.383(4) |
| C(20)-C(23) | 1.438(4) |
| C(21)-C(22) | 1.373(4) |
|  |  |
| C(9)-N(7)-C(1) | 125.3(2) |
| C(17)-N(8)-C(2) | 125.1(2) |
| N(7)-C(1)-C(6) | 112.8(2) |
| N(7)-C(1)-C(2) | 109.1(2) |
| C(6)-C(1)-C(2) | 110.2(2) |
| N(8)-C(2)-C(3) | 112.5(2) |
| N(8)-C(2)-C(1) | 110.1(2) |
| C(3)-C(2)-C(1) | 109.7(2) |
| C(4)-C(3)-C(2) | 111.6(3) |
| C(5)-C(4)-C(3) | 111.0(3) |
| C(4)-C(5)-C(6) | 110.5(3) |
| C(5)-C(6)-C(1) | 111.3(3) |
| N(7)-C(9)-C(14) | 119.4(3) |
| N(7)-C(9)-C(10) | 123.0(3) |
| C(14)-C(9)-C(10) | 117.7(3) |
| C(11)-C(10)-C(9) | 120.8(3) |
| C(10)-C(11)-C(12) | 121.0(3) |
| C(11)-C(12)-C(13) | 118.6(3) |
| C(11)-C(12)-C(15) | 120.7(3) |
| C(13)-C(12)-C(15) | 120.7(3) |
| C(14)-C(13)-C(12) | 120.4(3) |
| C(13)-C(14)-C(9) | 121.5(3) |
| N(16)-C(15)-C(12) | 178.1(5) |
| N(8)-C(17)-C(22) | 123.0(3) |
| N(8)-C(17)-C(18) | 120.0(2) |
| C(22)-C(17)-C(18) | 117.0(2) |
| C(19)-C(18)-C(17) | 121.5(3) |
| C(18)-C(19)-C(20) | 120.7(3) |
| C(21)-C(20)-C(19) | 119.0(3) |
| C(21)-C(20)-C(23) | 119.7(3) |
| C(19)-C(20)-C(23) | 121.2(3) |
| C(22)-C(21)-C(20) | 120.9(3) |
| C(21)-C(22)-C(17) | 121.0(3) |
| N(24)-C(23)-C(20) | 179.5(3) |

**Table 4**. Anisotropic displacement parameters (Å2 x 103) for **BCDC.H2O**. The anisotropic displacement factor exponent takes the form :

-2 2 [ h2 a*2 U11 + ... + 2 h k a* b* U12 ]

|  | **U11** | **U22** | **U33** | **U23** | **U13** | **U12** |
| --- | --- | --- | --- | --- | --- | --- |
| N(7) | 71(2) | 50(1) | 67(2) | 6(1) | 20(2) | 1(1) |
| N(8) | 75(2) | 43(1) | 58(1) | 1(1) | -16(1) | -11(1) |
| N(16) | 99(3) | 66(2) | 222(5) | -35(3) | 3(3) | -1(2) |
| N(24) | 102(2) | 71(2) | 96(2) | 26(2) | -2(2) | 21(2) |
| O(25) | 284(9) | 193(5) | 860(2) | 156(9) | 377(13) | 59(6) |
| C(1) | 53(2) | 50(1) | 51(2) | -1(1) | 1(1) | 2(1) |
| C(2) | 52(2) | 48(1) | 47(1) | -3(1) | -5(1) | -6(1) |
| C(3) | 67(2) | 58(2) | 59(2) | -8(1) | 3(2) | 4(2) |
| C(4) | 94(3) | 82(2) | 54(2) | -16(2) | -1(2) | -10(2) |
| C(5) | 104(3) | 94(2) | 49(2) | -2(2) | -9(2) | -18(2) |
| C(6) | 73(2) | 73(2) | 66(2) | 10(2) | -17(2) | -1(2) |
| C(9) | 50(2) | 50(1) | 52(1) | 4(1) | 1(2) | 4(1) |
| C(10) | 58(2) | 58(2) | 58(2) | 2(1) | 9(2) | 4(2) |
| C(11) | 60(2) | 51(2) | 77(2) | 12(2) | -2(2) | -2(2) |
| C(12) | 52(2) | 50(1) | 69(2) | 0(1) | -12(2) | 5(1) |
| C(13) | 61(2) | 63(2) | 61(2) | -7(2) | 1(2) | 11(2) |
| C(14) | 61(2) | 60(2) | 55(2) | 2(1) | 7(2) | 5(2) |
| C(15) | 63(2) | 63(2) | 119(3) | -11(2) | -10(2) | 3(2) |
| C(17) | 50(1) | 42(1) | 49(1) | -6(1) | -2(1) | 2(1) |
| C(18) | 64(2) | 46(1) | 54(2) | -6(1) | -11(2) | -7(1) |
| C(19) | 60(2) | 61(2) | 51(2) | -2(1) | -11(2) | 1(2) |
| C(20) | 51(2) | 52(1) | 54(2) | 2(1) | 4(1) | 8(1) |
| C(21) | 62(2) | 42(1) | 67(2) | -3(1) | 1(2) | -4(1) |
| C(22) | 57(2) | 47(1) | 54(1) | -4(1) | -11(1) | -8(1) |
| C(23) | 66(2) | 59(2) | 72(2) | 9(2) | 4(2) | 16(2) |

**Table 5**. Hydrogen coordinates ( x 104) and isotropic displacement parameters (Å2 x 103) for **BCDC.H2O**.

|  | **x** | **y** | **z** | **Ueq** |
| --- | --- | --- | --- | --- |
| H(7) | 5733 | 5046 | 901 | 75 |
| H(8) | 8946 | 4424 | 1167 | 70 |
| H(25A) | 3300(3) | 4690(7) | 1580(10) | 670 |
| H(25B) | 3600(3) | 3590(6) | 1590(10) | 670 |
| H(1) | 8371 | 5169 | -179 | 62 |
| H(2) | 6500 | 3652 | 269 | 59 |
| H(3A) | 9706 | 3714 | -545 | 74 |
| H(3B) | 8763 | 2846 | -297 | 74 |
| H(4A) | 8376 | 3155 | -1747 | 92 |
| H(4B) | 6623 | 3138 | -1276 | 92 |
| H(5A) | 6703 | 4367 | -2143 | 99 |
| H(5B) | 8407 | 4677 | -1723 | 99 |
| H(6A) | 5240 | 4605 | -875 | 85 |
| H(6B) | 6169 | 5474 | -1134 | 85 |
| H(10) | 7852 | 6590 | -318 | 69 |
| H(11) | 7879 | 8066 | -60 | 75 |
| H(13) | 4909 | 7709 | 1978 | 74 |
| H(14) | 4904 | 6234 | 1733 | 70 |
| H(18) | 10019 | 3851 | 2444 | 65 |
| H(19) | 10205 | 2712 | 3368 | 69 |
| H(21) | 7295 | 1247 | 1845 | 69 |
| H(22) | 7055 | 2391 | 913 | 63 |

**[Cu(BCDC)]PF6**.**THF**


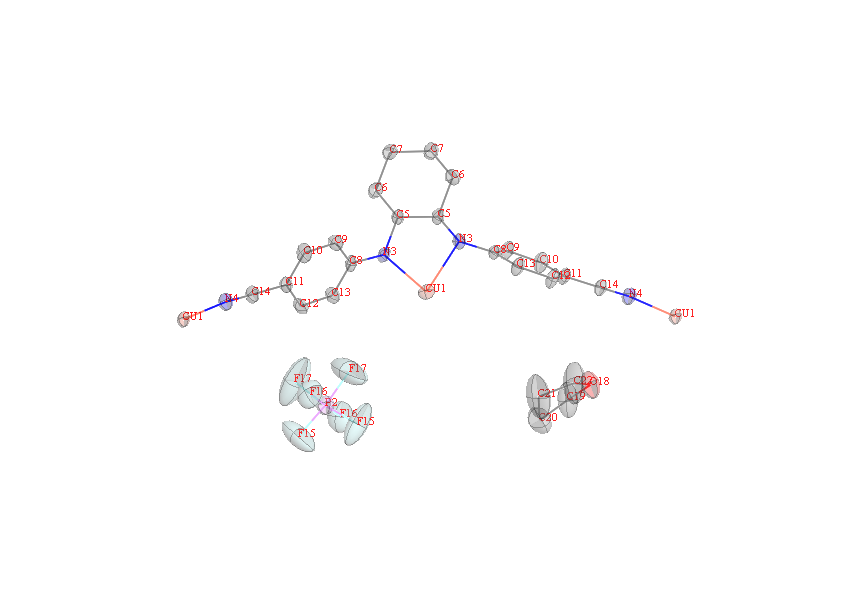


**Molecular Structure (double the asymmetric unit)**


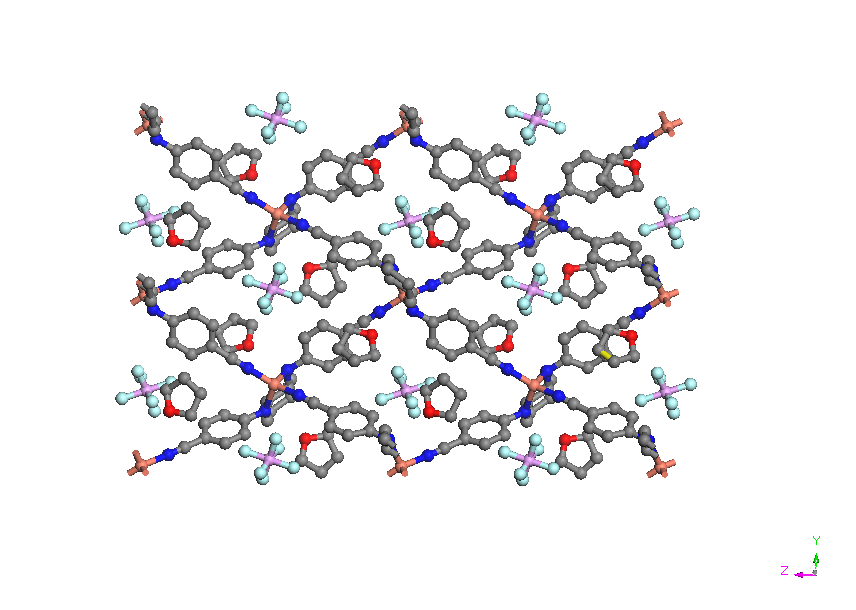


**Packing Diagram including counterion and solvent molecule**

**Table 1**. Detailed crystallographic data for **[Cu(BCDC)]PF6**.**THF**

| Molecular formula | C28H36CuF6N4O2P |
| --- | --- |
| Formula weight | 669.12 |
| Crystal system | Orthorhombic |
| Space group | P22121 (No. 18) |
| Color and appearance | Colorless, cube |
| Dimensions, mm x mm x mm | 0.56 x 0.52 x 0.48 |
| a / Å | 9.5577(9) |
| b / Å | 10.4800(12) |
| c / Å | 15.639(2) |
| V / Å3 | 1566.5(3) |
| F(000) | 692 |
| Z | 2 |
| calc. / g cm-3 | 1.419 |
| , cm-1 | 8.2 |
| Temperature / K | 293(2) |
|  / Å | 0.71703 |
|  range / deg. | 2.13-31.96 |
| Index ranges | 0h14, 0k15, 0l23 |
| No. reflections collected/unique | 3086/3030 [Rint = 0.0000] |
| Completeness to 2=31.96 | 100.0% |
| Refinement method | Full-matrix least-squareso n F2 |
| No. of reflections with I  2I | 1530 |
| No. of restraints, parameters | 0, 196 |
| Goodness-of-fit on F2 | 1.155 |
| R [for I  2I] | 0.0653 |
| wR2[for I  2I] | 0.1464 |
| R [all data] | 0.1522 |
| wR2 [all data] | 0.2112 |
| Absolute Structure Parameter (Flack) | -0.0424(439) |
| Largest difference peak /e Å-3 | 0.67 |
| Largest difference hole /e Å-3 | -0.35 |
| Tmin (psi-scan absorption correction) | 0.9756 |
| Tmax (psi-scan absorption correction) | 0.9990 |

**Table 2**. Atomic coordinates ( x 104) and equivalent isotropic displacement parameters (Å2 x 103) for **[Cu(BCDC)]PF6**.**THF**. Ueq is defined as one third of the trace of the orthogonalized Uij tensor.

|  | **x** | **y** | **z** | **Ueq** |
| --- | --- | --- | --- | --- |
| Cu(1) | 5530(1) | 10000 | 10000 | 49(1) |
| N(3) | 7317(6) | 8805(5) | 9588(3) | 45(1) |
| N(4) | 5226(7) | 5776(6) | 5994(4) | 61(2) |
| C(5) | 8581(7) | 9584(6) | 9599(4) | 48(2) |
| C(6) | 9936(8) | 8799(8) | 9559(5) | 63(2) |
| C(7) | 11243(9) | 9570(10) | 9600(5) | 80(3) |
| C(8) | 6909(7) | 8195(6) | 8823(3) | 42(2) |
| C(9) | 7366(8) | 8564(8) | 8022(4) | 55(2) |
| C(10) | 6899(9) | 7959(9) | 7297(4) | 66(2) |
| C(11) | 5997(8) | 6943(8) | 7361(4) | 57(2) |
| C(12) | 5505(9) | 6555(8) | 8159(4) | 62(2) |
| C(13) | 5971(8) | 7173(7) | 8879(4) | 56(2) |
| C(14) | 5549(9) | 6290(8) | 6593(4) | 59(2) |
| P(2) | 2591(4) | 5000 | 10000 | 81(1) |
| F(15) | 1592(15) | 5999(12) | 10290(6) | 244(7) |
| F(16) | 2582(11) | 5478(8) | 9062(5) | 158(3) |
| F(17) | 3769(15) | 5866(18) | 10273(7) | 298(11) |
| O(18) | 7739(12) | 7251(11) | 11142(5) | 132(3) |
| C(19) | 7920(2) | 6042(17) | 11031(12) | 197(8) |
| C(20) | 8790(3) | 5520(2) | 11735(14) | 183(11) |
| C(21) | 8320(3) | 6360(3) | 12362(11) | 265(16) |
| C(22) | 8100(3) | 7520(2) | 11980(10) | 227(15) |

**Table 3**. Bond lengths [Å] and angles [o] for **[Cu(BCDC)]PF6**.**THF**

| **Bond/Bonds** | **Distance/Angle** |
| --- | --- |
| Cu(1)-N(4)#1 | 1.897(6) |
| Cu(1)-N(4)#2 | 1.897(6) |
| Cu(1)-N(3)#3 | 2.213(6) |
| Cu(1)-N(3) | 2.213(6) |
| N(3)-C(8) | 1.412(7) |
| N(3)-C(5) | 1.459(9) |
| N(4)-C(14) | 1.124(8) |
| N(4)-Cu(1)#4 | 1.897(6) |
| C(5)-C(5)#3 | 1.529(11) |
| C(5)-C(6) | 1.535(10) |
| C(6)-C(7) | 1.489(12) |
| C(7)-C(7)#3 | 1.542(15) |
| C(8)-C(9) | 1.382(9) |
| C(8)-C(13) | 1.400(10) |
| C(9)-C(10) | 1.373(10) |
| C(10)-C(11) | 1.374(12) |
| C(11)-C(12) | 1.394(10) |
| C(11)-C(14) | 1.447(9) |
| C(12)-C(13) | 1.374(9) |
| P(2)-F(15)#5 | 1.488(9) |
| P(2)-F(15) | 1.488(9) |
| P(2)-F(17) | 1.508(12) |
| P(2)-F(17)#5 | 1.508(11) |
| P(2)-F(16)#5 | 1.551(8) |
| P(2)-F(16) | 1.551(8) |
| O(18)-C(19) | 1.291(18) |
| O(18)-C(22) | 1.39(2) |
| C(19)-C(20) | 1.48(3) |
| C(20)-C(21) | 1.39(3) |
| C(21)-C(22) | 1.38(2) |
|  |  |
| N(4)#1-Cu(1)-N(4)#2 | 135.2(4) |
| N(4)#1-Cu(1)-N(3)#3 | 106.8(2) |
| N(4)#2-Cu(1)-N(3)#3 | 107.3(2) |
| N(4)#1-Cu(1)-N(3) | 107.3(2) |
| N(4)#2-Cu(1)-N(3) | 106.8(2) |
| N(3)#3-Cu(1)-N(3) | 79.0(3) |
| C(8)-N(3)-C(5) | 119.4(5) |
| C(8)-N(3)-Cu(1) | 106.9(4) |
| C(5)-N(3)-Cu(1) | 108.6(4) |
| C(14)-N(4)-Cu(1)#4 | 173.2(7) |
| N(3)-C(5)-C(5)#3 | 109.2(4) |
| N(3)-C(5)-C(6) | 113.5(5) |
| C(5)#3-C(5)-C(6) | 109.8(4) |
| C(7)-C(6)-C(5) | 114.5(7) |
| C(6)-C(7)-C(7)#3 | 110.7(6) |
| C(9)-C(8)-C(13) | 118.3(6) |
| C(9)-C(8)-N(3) | 123.7(6) |
| C(13)-C(8)-N(3) | 118.0(5) |
| C(10)-C(9)-C(8) | 121.1(7) |
| C(9)-C(10)-C(11) | 120.1(7) |
| C(10)-C(11)-C(12) | 120.2(6) |
| C(10)-C(11)-C(14) | 119.5(6) |
| C(12)-C(11)-C(14) | 120.3(7) |
| C(13)-C(12)-C(11) | 119.2(7) |
| C(12)-C(13)-C(8) | 121.1(6) |
| N(4)-C(14)-C(11) | 178.7(9) |
| F(15)#5-P(2)-F(15) | 100.1(13) |
| F(15)#5-P(2)-F(17) | 171.6(11) |
| F(15)-P(2)-F(17) | 88.2(9) |
| F(15)#5-P(2)-F(17)#5 | 88.2(9) |
| F(15)-P(2)-F(17)#5 | 171.6(11) |
| F(17)-P(2)-F(17)#5 | 83.4(14) |
| F(15)#5-P(2)-F(16)#5 | 93.3(5) |
| F(15)-P(2)-F(16)#5 | 86.3(5) |
| F(17)-P(2)-F(16)#5 | 86.0(6) |
| F(17)#5-P(2)-F(16)#5 | 94.5(6) |
| F(15)#5-P(2)-F(16) | 86.3(5) |
| F(15)-P(2)-F(16) | 93.3(5) |
| F(17)-P(2)-F(16) | 94.5(6) |
| F(17)#5-P(2)-F(16) | 86.0(6) |
| F(16)#5-P(2)-F(16) | 179.3(8) |
| C(19)-O(18)-C(22) | 107.2(14) |
| O(18)-C(19)-C(20) | 109.7(17) |
| C(21)-C(20)-C(19) | 96.4(18) |
| C(20)-C(21)-C(22) | 107.6(17) |
| O(18)-C(22)-C(21) | 105.4(17) |

Symmetry transformations used to generate equivalent atoms:

#1 -x+1,y+1/2,-z+3/2 #2 -x+1,-y+3/2,z+1/2

#3 x,-y+2,-z+2 #4 -x+1,-y+3/2,z-1/2

#5 x,-y+1,-z+2

**Table 4**. Anisotropic displacement parameters (Å2 x 103) for **[Cu(BCDC)]PF6**.**THF**

|  | **U11** | **U22** | **U33** | **U23** | **U13** | **U12** |
| --- | --- | --- | --- | --- | --- | --- |
| Cu(1) | 53(1) | 64(1) | 31(1) | 11(1) | 0 | 0 |
| N(3) | 54(3) | 51(3) | 28(2) | -3(2) | 0(2) | 5(3) |
| N(4) | 56(4) | 84(4) | 41(3) | -15(3) | -5(3) | -4(4) |
| C(5) | 61(4) | 53(4) | 31(3) | -8(2) | 4(3) | -2(3) |
| C(6) | 57(4) | 75(5) | 56(4) | -16(4) | 4(3) | 8(4) |
| C(7) | 44(4) | 122(9) | 75(5) | -49(5) | 2(4) | -2(5) |
| C(8) | 50(4) | 49(4) | 27(2) | -9(2) | -1(2) | 6(3) |
| C(9) | 68(4) | 61(4) | 34(3) | -2(3) | 3(3) | -17(4) |
| C(10) | 85(6) | 81(5) | 30(3) | -4(4) | 0(3) | -5(5) |
| C(11) | 65(4) | 71(4) | 35(3) | -14(3) | -4(3) | -10(4) |
| C(12) | 66(5) | 79(5) | 42(3) | -15(3) | -5(4) | -28(5) |
| C(13) | 67(4) | 64(4) | 36(3) | -4(3) | 2(3) | -16(4) |
| C(14) | 64(4) | 76(4) | 35(3) | -13(3) | -9(3) | 6(4) |
| P(2) | 78(2) | 97(2) | 67(2) | -19(2) | 0 | 0 |
| F(15) | 349(15) | 256(11) | 127(8) | 18(7) | 48(9) | 201(12) |
| F(16) | 205(8) | 181(8) | 87(4) | 12(5) | 22(5) | 2(7) |
| F(17) | 278(15) | 460(2) | 157(11) | -75(12) | 64(10) | -241(18) |
| O(18) | 178(8) | 134(7) | 85(5) | 39(5) | -25(6) | 23(7) |
| C(19) | 330(2) | 121(12) | 138(14) | 56(11) | -39(16) | -55(15) |
| C(20) | 160(2) | 200(2) | 188(18) | 79(17) | 31(18) | 54(19) |
| C(21) | 390(4) | 280(3) | 118(14) | 84(18) | -110(2) | 0(3) |
| C(22) | 410(5) | 180(2) | 89(11) | 32(13) | 30(18) | 40(3) |

**Table 5**. Hydrogen coordinates ( x 104) and isotropic displacement parameters (Å2 x 103) for **[Cu(BCDC)]PF6**.**THF**

|  | **x** | **y** | **z** | **Ueq** |
| --- | --- | --- | --- | --- |
| H(3) | 7429 | 8185 | 9990 | 54 |
| H(5) | 8558 | 10148 | 9099 | 58 |
| H(6A) | 9937 | 8195 | 10029 | 76 |
| H(6B) | 9939 | 8312 | 9031 | 76 |
| H(7A) | 11318 | 10094 | 9091 | 96 |
| H(7B) | 12046 | 9004 | 9618 | 96 |
| H(9) | 8001 | 9233 | 7972 | 65 |
| H(10) | 7193 | 8239 | 6762 | 79 |
| H(12) | 4870 | 5886 | 8203 | 75 |
| H(13) | 5658 | 6907 | 9414 | 67 |
| H(19A) | 8380 | 5892 | 10487 | 236 |
| H(19B) | 7020 | 5614 | 11021 | 236 |
| H(20A) | 8562 | 4639 | 11864 | 220 |
| H(20B) | 9781 | 5607 | 11625 | 220 |
| H(21A) | 9010 | 6432 | 12812 | 318 |
| H(21B) | 7454 | 6042 | 12611 | 318 |
| H(22A) | 7349 | 7980 | 12265 | 272 |
| H(22B) | 8941 | 8037 | 12002 | 272 |

**[Ag(BCDC)]ClO4**

**
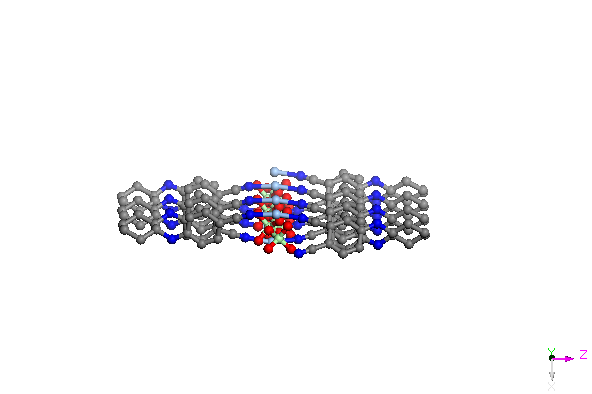

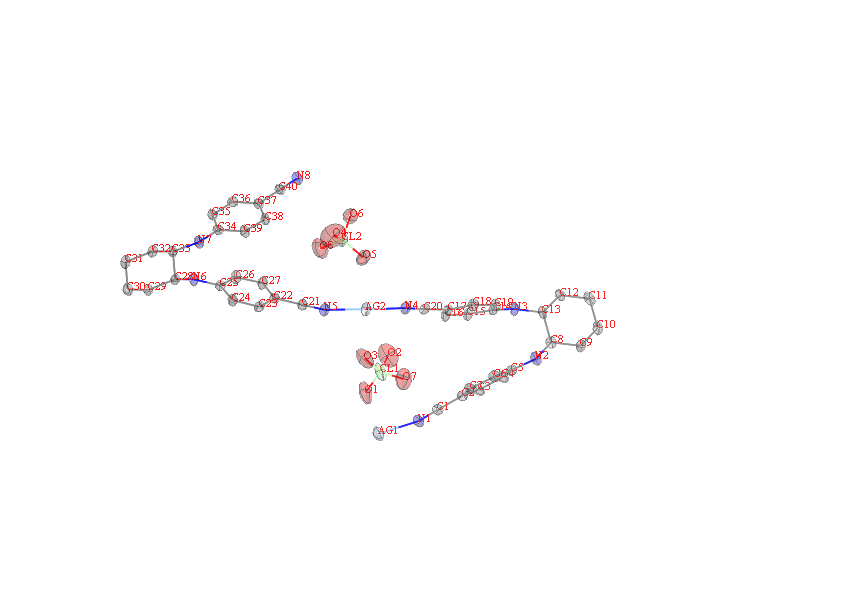
**

**Molecular Structure (asymmetric unit)**

**Packing Diagram including counterion**

**Table 1**. Detailed crystallographic data for **[Ag(BCDC)]ClO4**

| Molecular formula | C20H20AgClN4O4 |
| --- | --- |
| Formula weight | 523.72 |
| Crystal system | Orthorhombic |
| Space group | P212121 (No. 19) |
| Color and appearance | Colorless, cube |
| Dimensions, mm x mm x mm | 0.64 x 0.60 x 0.48 |
| a / Å | 9.488(3) |
| b / Å | 14.094(3) |
| c / Å | 31.354(4) |
| V / Å3 | 4193.0(16) |
| F(000) | 2112 |
| Z | 8 |
| calc. / g cm-3 | 1.659 |
| , cm-1 | 11.2 |
| Temperature / K | 293(2) |
|  / Å | 0.71703 |
|  range / deg. | 1.3-25.47 |
| Index ranges | 0h11, 0k17, 0l37 |
| No. reflections collected/unique | 4401/4368 [Rint = 0.0000] |
| Completeness to 2=25.47 | 99.8% |
| Refinement method | Full-matrix least-squareso n F2 |
| No. of reflections with I  2I | 3794 |
| No. of restraints, parameters | 0, 561 |
| Goodness-of-fit on F2 | 1.198 |
| R [for I  2I] | 0.0445 |
| wR2[for I  2I] | 0.1194 |
| R [all data] | 0.0652 |
| wR2 [all data] | 0.1418 |
| Absolute Structure Parameter (Flack) | 0.0893(521) |
| Largest difference peak /e Å-3 | 0.78 |
| Largest difference hole /e Å-3 | -0.57 |
| Tmin (psi-scan absorption correction) | 0.9557 |
| Tmax (psi-scan absorption correction) | 0.9998 |

**Table 2**. Atomic coordinates ( x 104) and equivalent isotropic displacement parameters (Å2 x 103) for **[Ag(BCDC)]ClO4**. Ueq is defined as one third of the trace of the orthogonalized Uij tensor.

|  | **x** | **y** | **z** | **Ueq** |
| --- | --- | --- | --- | --- |
| Ag(1) | 3963(1) | 2698(1) | 8711(1) | 91(1) |
| Ag(2) | 1061(1) | -2346(1) | 8825(1) | 74(1) |
| Cl(1) | 2404(3) | 237(2) | 8641(1) | 80(1) |
| Cl(2) | 2799(3) | -4721(2) | 8878(1) | 84(1) |
| O(1) | 2967(13) | 962(7) | 8895(3) | 156(5) |
| O(2) | 3504(11) | -94(10) | 8380(3) | 157(5) |
| O(3) | 1844(12) | -466(7) | 8907(3) | 137(4) |
| O(4) | 1720(14) | -5113(12) | 9110(5) | 213(7) |
| O(5) | 2201(14) | -4012(8) | 8636(3) | 171(6) |
| O(6) | 3555(9) | -5357(6) | 8624(2) | 110(3) |
| O(7) | 1330(11) | 505(9) | 8372(3) | 146(4) |
| O(8) | 3707(13) | -4434(10) | 9195(4) | 177(6) |
| N(1) | 3531(9) | 2503(5) | 8058(2) | 70(2) |
| N(2) | 1321(7) | 872(5) | 6165(2) | 54(2) |
| N(3) | 3290(7) | -742(5) | 6215(2) | 53(2) |
| N(4) | 1133(9) | -2043(5) | 8167(2) | 66(2) |
| N(5) | 1374(9) | -2613(5) | 9474(2) | 67(2) |
| N(6) | 3377(7) | -4431(5) | 11357(2) | 51(2) |
| N(7) | 1424(7) | -6046(5) | 11335(2) | 51(2) |
| N(8) | 3756(10) | -7108(5) | 9373(2) | 70(2) |
| C(1) | 3210(9) | 2197(6) | 7742(2) | 54(2) |
| C(2) | 2782(10) | 1829(6) | 7338(2) | 55(2) |
| C(3) | 3647(9) | 1899(6) | 6981(2) | 54(2) |
| C(4) | 3192(10) | 1565(6) | 6591(3) | 56(2) |
| C(5) | 1854(8) | 1164(6) | 6548(2) | 48(2) |
| C(6) | 1011(9) | 1100(6) | 6910(2) | 53(2) |
| C(7) | 1445(8) | 1415(6) | 7300(3) | 52(2) |
| C(8) | 2170(8) | 551(6) | 5803(2) | 44(2) |
| C(9) | 1416(9) | 789(6) | 5386(2) | 54(2) |
| C(10) | 2206(11) | 431(7) | 5000(2) | 65(2) |
| C(11) | 2502(10) | -625(7) | 5032(2) | 62(2) |
| C(12) | 3275(8) | -867(6) | 5436(2) | 47(2) |
| C(13) | 2486(8) | -529(6) | 5832(2) | 46(2) |
| C(14) | 2761(9) | -977(5) | 6607(2) | 43(2) |
| C(15) | 3640(9) | -880(6) | 6962(2) | 52(2) |
| C(16) | 3200(9) | -1115(6) | 7364(2) | 55(2) |
| C(17) | 1869(9) | -1510(5) | 7416(2) | 48(2) |
| C(18) | 986(10) | -1629(5) | 7072(2) | 56(2) |
| C(19) | 1423(9) | -1360(6) | 6668(2) | 51(2) |
| C(20) | 1428(9) | -1798(5) | 7835(2) | 52(2) |
| C(21) | 1663(9) | -2923(6) | 9797(2) | 53(2) |
| C(22) | 2038(9) | -3324(5) | 10197(2) | 49(2) |
| C(23) | 1144(10) | -3302(5) | 10549(2) | 53(2) |
| C(24) | 1551(9) | -3684(6) | 10930(2) | 54(2) |
| C(25) | 2892(8) | -4074(5) | 10984(2) | 43(2) |
| C(26) | 3780(9) | -4088(6) | 10629(2) | 54(2) |
| C(27) | 3385(9) | -3725(6) | 10243(2) | 54(2) |
| C(28) | 2533(8) | -4729(6) | 11729(2) | 43(2) |
| C(29) | 3322(8) | -4447(6) | 12134(2) | 47(2) |
| C(30) | 2515(9) | -4764(7) | 12531(2) | 59(2) |
| C(31) | 2211(10) | -5813(7) | 12520(2) | 59(2) |
| C(32) | 1458(9) | -6097(6) | 12114(2) | 50(2) |
| C(33) | 2226(8) | -5792(6) | 11719(2) | 43(2) |
| C(34) | 1985(9) | -6236(6) | 10943(2) | 49(2) |
| C(35) | 3341(9) | -6582(6) | 10880(2) | 51(2) |
| C(36) | 3823(10) | -6791(5) | 10478(2) | 53(2) |
| C(37) | 2995(9) | -6663(5) | 10128(2) | 51(2) |
| C(38) | 1602(9) | -6294(6) | 10179(2) | 51(2) |
| C(39) | 1159(9) | -6101(6) | 10583(2) | 51(2) |
| C(40) | 3439(9) | -6912(6) | 9707(2) | 52(2) |

**Table 3**. Bond lengths [Å] and angles [o] for **[Ag(BCDC)]ClO4**

| **Bond/Bonds** | **Distance/angle** |
| --- | --- |
| Ag(1)-N(8)#1 | 2.102(6) |
| Ag(1)-N(1) | 2.105(7) |
| Ag(2)-N(5) | 2.092(6) |
| Ag(2)-N(4) | 2.106(6) |
| Cl(1)-O(7) | 1.376(10) |
| Cl(1)-O(3) | 1.401(8) |
| Cl(1)-O(1) | 1.401(8) |
| Cl(1)-O(2) | 1.405(11) |
| Cl(2)-O(8) | 1.376(10) |
| Cl(2)-O(4) | 1.373(12) |
| Cl(2)-O(5) | 1.378(9) |
| Cl(2)-O(6) | 1.398(7) |
| N(1)-C(1) | 1.123(10) |
| N(2)-C(5) | 1.367(9) |
| N(2)-C(8) | 1.463(9) |
| N(3)-C(14) | 1.369(9) |
| N(3)-C(13) | 1.453(9) |
| N(4)-C(20) | 1.132(9) |
| N(5)-C(21) | 1.135(10) |
| N(6)-C(25) | 1.352(9) |
| N(6)-C(28) | 1.477(9) |
| N(7)-C(34) | 1.365(10) |
| N(7)-C(33) | 1.469(9) |
| N(8)-C(40) | 1.125(10) |
| N(8)-Ag(1)#2 | 2.102(6) |
| C(1)-C(2) | 1.428(11) |
| C(2)-C(3) | 1.392(11) |
| C(2)-C(7) | 1.401(12) |
| C(3)-C(4) | 1.379(11) |
| C(4)-C(5) | 1.397(12) |
| C(5)-C(6) | 1.391(10) |
| C(6)-C(7) | 1.364(11) |
| C(8)-C(9) | 1.527(10) |
| C(8)-C(13) | 1.553(12) |
| C(9)-C(10) | 1.511(11) |
| C(10)-C(11) | 1.518(14) |
| C(11)-C(12) | 1.503(10) |
| C(12)-C(13) | 1.525(10) |
| C(14)-C(15) | 1.397(10) |
| C(14)-C(19) | 1.393(11) |
| C(15)-C(16) | 1.369(11) |
| C(16)-C(17) | 1.390(12) |
| C(17)-C(18) | 1.376(11) |
| C(17)-C(20) | 1.439(11) |
| C(18)-C(19) | 1.384(10) |
| C(21)-C(22) | 1.423(11) |
| C(22)-C(23) | 1.391(11) |
| C(22)-C(27) | 1.405(12) |
| C(23)-C(24) | 1.365(10) |
| C(24)-C(25) | 1.397(11) |
| C(25)-C(26) | 1.397(10) |
| C(26)-C(27) | 1.365(10) |
| C(28)-C(33) | 1.527(12) |
| C(28)-C(29) | 1.528(10) |
| C(29)-C(30) | 1.527(10) |
| C(30)-C(31) | 1.507(13) |
| C(31)-C(32) | 1.512(10) |
| C(32)-C(33) | 1.500(10) |
| C(34)-C(35) | 1.390(11) |
| C(34)-C(39) | 1.387(10) |
| C(35)-C(36) | 1.374(10) |
| C(36)-C(37) | 1.362(11) |
| C(37)-C(38) | 1.429(12) |
| C(37)-C(40) | 1.430(11) |
| C(38)-C(39) | 1.361(10) |
|  |  |
| N(8)#1-Ag(1)-N(1) | 163.4(4) |
| N(5)-Ag(2)-N(4) | 169.9(4) |
| O(7)-Cl(1)-O(3) | 106.2(7) |
| O(7)-Cl(1)-O(1) | 115.5(8) |
| O(3)-Cl(1)-O(1) | 108.7(5) |
| O(7)-Cl(1)-O(2) | 106.5(8) |
| O(3)-Cl(1)-O(2) | 113.2(7) |
| O(1)-Cl(1)-O(2) | 106.8(7) |
| O(8)-Cl(2)-O(4) | 101.7(10) |
| O(8)-Cl(2)-O(5) | 116.3(8) |
| O(4)-Cl(2)-O(5) | 106.1(8) |
| O(8)-Cl(2)-O(6) | 106.2(6) |
| O(4)-Cl(2)-O(6) | 115.3(8) |
| O(5)-Cl(2)-O(6) | 111.3(5) |
| C(1)-N(1)-Ag(1) | 163.9(7) |
| C(5)-N(2)-C(8) | 124.8(7) |
| C(14)-N(3)-C(13) | 126.8(6) |
| C(20)-N(4)-Ag(2) | 165.9(8) |
| C(21)-N(5)-Ag(2) | 166.1(7) |
| C(25)-N(6)-C(28) | 127.1(7) |
| C(34)-N(7)-C(33) | 125.7(7) |
| C(40)-N(8)-Ag(1)#2 | 167.6(8) |
| N(1)-C(1)-C(2) | 178.5(10) |
| C(3)-C(2)-C(7) | 119.6(7) |
| C(3)-C(2)-C(1) | 121.4(8) |
| C(7)-C(2)-C(1) | 119.0(8) |
| C(4)-C(3)-C(2) | 120.3(8) |
| C(3)-C(4)-C(5) | 120.5(8) |
| N(2)-C(5)-C(6) | 119.0(7) |
| N(2)-C(5)-C(4) | 122.9(7) |
| C(6)-C(5)-C(4) | 118.0(8) |
| C(7)-C(6)-C(5) | 122.4(8) |
| C(6)-C(7)-C(2) | 119.1(8) |
| N(2)-C(8)-C(9) | 109.7(6) |
| N(2)-C(8)-C(13) | 111.3(6) |
| C(9)-C(8)-C(13) | 110.8(6) |
| C(8)-C(9)-C(10) | 112.4(7) |
| C(9)-C(10)-C(11) | 111.4(7) |
| C(12)-C(11)-C(10) | 111.7(7) |
| C(11)-C(12)-C(13) | 112.0(7) |
| N(3)-C(13)-C(12) | 110.5(6) |
| N(3)-C(13)-C(8) | 110.6(6) |
| C(12)-C(13)-C(8) | 110.7(6) |
| N(3)-C(14)-C(15) | 118.2(7) |
| N(3)-C(14)-C(19) | 123.6(7) |
| C(15)-C(14)-C(19) | 118.1(7) |
| C(16)-C(15)-C(14) | 121.9(8) |
| C(15)-C(16)-C(17) | 118.8(7) |
| C(18)-C(17)-C(16) | 120.7(7) |
| C(18)-C(17)-C(20) | 120.3(8) |
| C(16)-C(17)-C(20) | 119.0(8) |
| C(19)-C(18)-C(17) | 120.0(8) |
| C(18)-C(19)-C(14) | 120.4(7) |
| N(4)-C(20)-C(17) | 177.1(10) |
| N(5)-C(21)-C(22) | 179.1(9) |
| C(23)-C(22)-C(27) | 118.8(7) |
| C(23)-C(22)-C(21) | 122.6(8) |
| C(27)-C(22)-C(21) | 118.5(8) |
| C(24)-C(23)-C(22) | 120.8(8) |
| C(23)-C(24)-C(25) | 121.3(7) |
| N(6)-C(25)-C(26) | 118.6(7) |
| N(6)-C(25)-C(24) | 124.2(7) |
| C(26)-C(25)-C(24) | 117.2(7) |
| C(27)-C(26)-C(25) | 122.4(8) |
| C(26)-C(27)-C(22) | 119.4(8) |
| N(6)-C(28)-C(33) | 111.6(6) |
| N(6)-C(28)-C(29) | 108.5(6) |
| C(33)-C(28)-C(29) | 111.5(6) |
| C(28)-C(29)-C(30) | 110.8(7) |
| C(31)-C(30)-C(29) | 111.4(7) |
| C(30)-C(31)-C(32) | 111.7(7) |
| C(33)-C(32)-C(31) | 112.9(7) |
| N(7)-C(33)-C(32) | 110.9(7) |
| N(7)-C(33)-C(28) | 110.8(6) |
| C(32)-C(33)-C(28) | 110.9(7) |
| N(7)-C(34)-C(35) | 123.9(7) |
| N(7)-C(34)-C(39) | 119.0(7) |
| C(35)-C(34)-C(39) | 117.1(7) |
| C(36)-C(35)-C(34) | 121.0(8) |
| C(37)-C(36)-C(35) | 121.2(8) |
| C(36)-C(37)-C(38) | 119.4(8) |
| C(36)-C(37)-C(40) | 122.8(8) |
| C(38)-C(37)-C(40) | 117.8(7) |
| C(39)-C(38)-C(37) | 117.6(7) |
| C(38)-C(39)-C(34) | 123.7(8) |
| N(8)-C(40)-C(37) | 178.4(10) |

**Table 4**. Anisotropic displacement parameters (Å2 x 103) for **[Ag(BCDC)]ClO4**

|  | **U11** | **U22** | **U33** | **U23** | **U13** | **U12** |
| --- | --- | --- | --- | --- | --- | --- |
| Ag(1) | 147(1) | 85(1) | 41(1) | -8(1) | -1(1) | -16(1) |
| Ag(2) | 108(1) | 73(1) | 40(1) | 13(1) | -4(1) | 14(1) |
| Cl(1) | 81(2) | 114(2) | 45(1) | -1(1) | -2(1) | -59(2) |
| Cl(2) | 87(2) | 121(2) | 44(1) | -1(1) | 1(1) | 64(2) |
| O(1) | 244(12) | 147(9) | 77(5) | 14(6) | -43(7) | -129(9) |
| O(2) | 118(8) | 212(13) | 140(8) | -15(8) | 54(7) | -49(9) |
| O(3) | 203(10) | 131(7) | 78(5) | -15(5) | 60(6) | -90(8) |
| O(4) | 139(10) | 250(16) | 251(14) | 48(13) | 111(11) | 47(11) |
| O(5) | 252(14) | 169(10) | 93(6) | -10(6) | -32(8) | 152(10) |
| O(6) | 119(6) | 134(7) | 76(4) | -2(4) | 30(5) | 71(6) |
| O(7) | 119(8) | 175(10) | 143(8) | 18(7) | -52(7) | -35(8) |
| O(8) | 181(11) | 221(13) | 128(8) | -51(9) | -70(8) | 69(11) |
| N(1) | 99(6) | 63(5) | 47(4) | -11(3) | 5(4) | 8(5) |
| N(2) | 42(4) | 79(5) | 42(3) | -13(3) | -2(3) | 3(4) |
| N(3) | 37(3) | 76(5) | 45(4) | 5(3) | -10(3) | 2(3) |
| N(4) | 95(6) | 56(4) | 46(3) | 8(3) | -1(4) | 2(5) |
| N(5) | 96(6) | 63(4) | 43(3) | 15(3) | 2(3) | 5(5) |
| N(6) | 42(4) | 73(5) | 38(3) | 12(3) | 3(3) | -4(3) |
| N(7) | 40(4) | 68(4) | 44(3) | -10(3) | -3(3) | 1(3) |
| N(8) | 94(6) | 74(5) | 44(4) | -8(3) | -5(4) | -1(5) |
| C(1) | 71(5) | 47(5) | 42(4) | -2(4) | 2(4) | 5(4) |
| C(2) | 70(6) | 52(5) | 43(4) | -6(3) | 0(4) | 13(4) |
| C(3) | 55(5) | 54(4) | 54(4) | -10(4) | 3(4) | -12(4) |
| C(4) | 58(5) | 64(5) | 47(4) | -5(4) | 9(4) | -4(5) |
| C(5) | 47(5) | 45(4) | 52(4) | -1(3) | 1(4) | -3(4) |
| C(6) | 40(4) | 71(5) | 48(4) | -6(4) | 3(4) | 11(5) |
| C(7) | 43(5) | 63(5) | 51(4) | -6(4) | 11(4) | 12(4) |
| C(8) | 34(4) | 55(5) | 43(4) | -2(4) | -2(3) | -6(4) |
| C(9) | 51(5) | 72(5) | 40(4) | 9(4) | 0(4) | 4(4) |
| C(10) | 72(6) | 81(6) | 41(4) | 14(4) | -5(4) | -11(6) |
| C(11) | 65(6) | 78(6) | 43(4) | -9(4) | 2(4) | -11(5) |
| C(12) | 41(4) | 56(5) | 42(4) | -7(4) | -6(3) | 0(4) |
| C(13) | 40(4) | 62(5) | 36(4) | -3(3) | 0(3) | -15(4) |
| C(14) | 45(5) | 45(4) | 40(4) | 8(3) | 0(3) | 6(4) |
| C(15) | 52(5) | 62(5) | 43(4) | 7(4) | -10(4) | -2(4) |
| C(16) | 55(5) | 65(6) | 44(4) | 8(4) | -15(4) | -10(5) |
| C(17) | 60(5) | 43(4) | 41(4) | 6(3) | 2(4) | 13(4) |
| C(18) | 58(5) | 58(5) | 51(4) | 12(4) | -3(5) | -12(5) |
| C(19) | 59(5) | 62(5) | 33(3) | 0(3) | -4(3) | -8(4) |
| C(20) | 65(6) | 44(4) | 47(4) | 7(3) | -2(4) | 8(4) |
| C(21) | 63(5) | 48(5) | 49(4) | 0(3) | 6(4) | -3(4) |
| C(22) | 66(6) | 41(4) | 40(4) | 7(3) | -5(4) | -11(4) |
| C(23) | 59(5) | 54(5) | 47(4) | 5(3) | -4(4) | 14(5) |
| C(24) | 56(5) | 67(5) | 38(4) | 5(4) | 7(4) | 7(4) |
| C(25) | 46(5) | 40(4) | 43(4) | 6(3) | -5(4) | -11(4) |
| C(26) | 44(5) | 71(5) | 46(4) | 10(3) | 4(4) | -13(5) |
| C(27) | 55(5) | 62(5) | 45(4) | 8(4) | 0(4) | -6(4) |
| C(28) | 36(4) | 55(5) | 37(4) | 3(3) | 0(3) | 10(4) |
| C(29) | 48(4) | 56(5) | 36(4) | -3(3) | -1(3) | 1(4) |
| C(30) | 58(5) | 74(6) | 46(4) | -5(4) | -1(4) | 12(5) |
| C(31) | 59(6) | 76(6) | 41(4) | 11(4) | -4(4) | -2(5) |
| C(32) | 51(5) | 59(5) | 41(4) | 11(3) | -3(3) | 0(4) |
| C(33) | 40(4) | 54(5) | 37(4) | 1(3) | -1(3) | 7(4) |
| C(34) | 54(5) | 45(4) | 46(4) | -5(3) | -1(4) | -1(4) |
| C(35) | 56(5) | 63(5) | 35(4) | -7(4) | -8(4) | 4(4) |
| C(36) | 55(5) | 51(4) | 52(4) | -9(3) | -4(4) | 2(4) |
| C(37) | 62(5) | 48(4) | 43(4) | -4(3) | -1(4) | -10(4) |
| C(38) | 52(5) | 61(5) | 39(4) | -6(4) | -12(4) | -2(4) |
| C(39) | 37(4) | 66(5) | 48(4) | -7(4) | -12(4) | 2(5) |
| C(40) | 60(5) | 48(4) | 46(4) | -1(3) | -8(4) | -5(4) |

**Table 5**. Hydrogen coordinates ( x 104) and isotropic displacement parameters (Å2 x 103) for **[Ag(BCDC)]ClO4**

|  | **x** | **y** | **z** | **Ueq** |
| --- | --- | --- | --- | --- |
| H(2) | 420 | 877 | 6134 | 65 |
| H(3) | 4193 | -718 | 6192 | 63 |
| H(6) | 4276 | -4490 | 11379 | 61 |
| H(7) | 522 | -6078 | 11359 | 61 |
| H(3) | 4535 | 2171 | 7005 | 65 |
| H(4) | 3782 | 1608 | 6355 | 67 |
| H(6) | 118 | 833 | 6885 | 64 |
| H(7) | 863 | 1357 | 7537 | 63 |
| H(8) | 3069 | 893 | 5808 | 53 |
| H(9A) | 1307 | 1471 | 5365 | 65 |
| H(9B) | 482 | 509 | 5390 | 65 |
| H(10A) | 3089 | 772 | 4973 | 78 |
| H(10B) | 1653 | 555 | 4745 | 78 |
| H(11A) | 1618 | -970 | 5024 | 74 |
| H(11B) | 3062 | -822 | 4789 | 74 |
| H(12A) | 4201 | -577 | 5430 | 56 |
| H(12B) | 3401 | -1549 | 5452 | 56 |
| H(13) | 1587 | -869 | 5848 | 55 |
| H(15) | 4550 | -649 | 6923 | 63 |
| H(16) | 3782 | -1011 | 7598 | 65 |
| H(18) | 96 | -1890 | 7111 | 67 |
| H(19) | 820 | -1435 | 6437 | 61 |
| H(23) | 259 | -3024 | 10524 | 64 |
| H(24) | 923 | -3684 | 11157 | 64 |
| H(26) | 4673 | -4353 | 10656 | 64 |
| H(27) | 4002 | -3743 | 10013 | 65 |
| H(28) | 1634 | -4387 | 11722 | 51 |
| H(29A) | 3443 | -3763 | 12140 | 56 |
| H(29B) | 4250 | -4736 | 12134 | 56 |
| H(30A) | 3065 | -4617 | 12783 | 71 |
| H(30B) | 1634 | -4416 | 12549 | 71 |
| H(31A) | 1632 | -5981 | 12763 | 70 |
| H(31B) | 3090 | -6161 | 12541 | 70 |
| H(32A) | 1349 | -6781 | 12110 | 60 |
| H(32B) | 524 | -5818 | 12114 | 60 |
| H(33) | 3129 | -6130 | 11710 | 52 |
| H(35) | 3929 | -6673 | 11114 | 62 |
| H(36) | 4733 | -7026 | 10444 | 63 |
| H(38) | 1019 | -6190 | 9945 | 61 |
| H(39) | 251 | -5866 | 10619 | 61 |

**Details of Computations**

All semiempirical computations were carried out using the MOPAC93 program package1 using the AM1 method.2 The molecular structures from crystal structure analysis were employed; metal atoms were replaced by positive charges (sparkles) and H atom positions alone were optimized; PRECISE condition was employed. Hyperpolarizability was computed using the 'POLAR' keyword. These geometries were subsequently employed in the *ab initio*2 computations, where the metal atoms were restored at the appropriate sites. The hyperpolarizability presented is based on the common convention,4

avg = (x2 + x2 + x2)1/2

where i are the average projection values along directions i defined as :

x = (3xxx + 2yxy + 2zxz + xyy + xzz)/5

y = (3yyy + 2xxy + 2zyz + yxx + yzz)/5

z = (3zzz + 2xxz + 2yyz + zyy + zxx)/5

1. MOPAC93  Fujitsu Inc..

2. M. J. S. Dewar, E. G. Zoebisch, E. F. Healy and J. J. P. Stewart, *J. Am. Chem. Soc.* 1985, **107**, 3902.

3. Gaussian 03, Revision B.04, M. J. Frisch, G. W. Trucks, H. B. Schlegel, G. E. Scuseria, M. A. Robb, J. R. Cheeseman, J. A. Montgomery, Jr., T. Vreven, K. N. Kudin, J. C. Burant, J. M. Millam, S. S. Iyengar, J. Tomasi, V. Barone, B. Mennucci, M. Cossi, G. Scalmani, N. Rega, G. A. Petersson, H. Nakatsuji, M. Hada, M. Ehara, K. Toyota, R. Fukuda, J. Hasegawa, M. Ishida, T. Nakajima, Y. Honda, O. Kitao, H. Nakai, M. Klene, X. Li, J. E. Knox, H. P. Hratchian, J. B. Cross, C. Adamo, J. Jaramillo, R. Gomperts, R. E. Stratmann, O. Yazyev, A. J. Austin, R. Cammi, C. Pomelli, J. W. Ochterski, P. Y. Ayala, K. Morokuma, G. A. Voth, P. Salvador, J. J. Dannenberg, V. G. Zakrzewski, S. Dapprich, A. D. Daniels, M. C. Strain, O. Farkas, D. K. Malick, A. D. Rabuck, K. Raghavachari, J. B. Foresman, J. V. Ortiz, Q. Cui, A. G. Baboul, S. Clifford, J. Cioslowski, B. B. Stefanov, G. Liu, A. Liashenko, P. Piskorz, I. Komaromi, R. L. Martin, D. J. Fox, T. Keith, M. A. Al-Laham, C. Y. Peng, A. Nanayakkara, M. Challacombe, P. M. W. Gill, B. Johnson, W. Chen, M. W. Wong, C. Gonzalez, and J. A. Pople, Gaussian, Inc., Pittsburgh PA, 2003.

4. S. Sharma, P. Gangopadhyay, A. Swathi and T. P. Radhakrishnan, *Phys. Chem. Chem. Phys.*, 2000, **2**, 1147.

**Geometries used in AM1/TDHF and B3LYP/3-21G* computations of the hyperpolarizability**

**(the metal atoms replaced by sparkles in the semiempirical computation)**

BCDC - Cartesian Coordinates

=======================

N 0.4543 1.1413 -0.8474

H 0.4503 0.4871 -1.5944

N -0.7184 -1.0481 0.4485

H -1.3157 -0.3 0.72

N -1.6765 7.3749 -2.271

N -3.6597 -7.0122 -0.6844

C 1.0139 0.6781 0.417

H 0.5085 1.2518 1.2545

C 0.7094 -0.8123 0.5784

H 1.2337 -1.3873 -0.2472

C 1.2655 -1.3048 1.9147

H 0.7333 -0.793 2.7607

H 1.0722 -2.4058 2.0134

C 2.7551 -1.0435 2.0325

H 3.1127 -1.3891 3.0368

H 3.3044 -1.6402 1.2573

C 3.0618 0.4251 1.853

H 4.1697 0.5913 1.8803

H 2.6101 1.0141 2.6933

C 2.5138 0.9233 0.5235

H 2.7198 2.0219 0.4256

H 3.0507 0.404 -0.3143

C 0.0729 2.4287 -1.1199

C 0.2406 3.482 -0.2097

H 0.7232 3.3055 0.7655

C -0.1762 4.751 -0.5185

H -0.0321 5.5621 0.2158

C -0.7818 5.0284 -1.7384

C -0.9279 3.9908 -2.6658

H -1.3876 4.1964 -3.6473

C -0.5187 2.7224 -2.3538

H -0.6619 1.9248 -3.1036

C -1.2586 6.3393 -2.032

C -1.288 -2.2507 0.1902

C -2.6989 -2.3714 0.1473

H -3.3234 -1.4765 0.3129

C -3.3005 -3.5638 -0.0966

H -4.4023 -3.6301 -0.121

C -2.5412 -4.7111 -0.312

C -1.1628 -4.6166 -0.2858

H -0.5502 -5.5204 -0.451

C -0.5372 -3.4169 -0.0489

H 0.5636 -3.3871 -0.0335

C -3.1661 -5.9894 -0.5205

BCDC in [Cu(BCDC)]PF6.THF - Cartesian Coordinates

=======================================

N 2.5768 6.4939 7.1765

N 4.5529 9.6569 1.5467

C 1.3525 5.6795 7.1900

C .0582 6.5067 7.1299

C -1.1812 5.7059 7.1966

C 2.9475 7.1284 5.9761

C 2.5137 6.7502 4.7253

C 2.9479 7.3743 3.5938

C 3.8221 8.4511 3.6923

C 4.2896 8.8586 4.9424

C 3.8410 8.2078 6.0659

C 4.2409 9.1255 2.4930

H 2.6980 7.0497 7.9950

H 1.3755 5.0031 6.2843

H .0664 7.2499 7.9757

H .0717 7.1041 6.1761

H -1.2921 5.0686 6.2801

H -2.0768 6.3775 7.2505

H 1.7984 5.9168 4.6036

H 2.5933 7.0423 2.6036

H 4.9959 9.6996 5.0249

H 4.2102 8.5410 7.0512

N 2.5768 3.9861 8.4624

N 4.5529 .8231 14.0922

C 1.3525 4.8005 8.4489

C .0582 3.9733 8.5090

C -1.1812 4.7741 8.4423

C 2.9475 3.3516 9.6628

C 2.5137 3.7298 10.9136

C 2.9479 3.1057 12.0451

C 3.8221 2.0289 11.9466

C 4.2896 1.6214 10.6965

C 3.8410 2.2722 9.5730

C 4.2409 1.3545 13.1459

H 2.6976 3.4302 7.6439

H 1.3755 5.4769 9.3546

H .0664 3.2301 7.6632

H .0717 3.3762 9.4628

H -1.2923 5.4114 9.3588

H -2.0767 4.1023 8.3882

H 1.7984 4.5632 11.0353

H 2.5933 3.4377 13.0353

H 4.9959 .7804 10.6140

H 4.2102 1.9390 8.5877

BCDC(Cu)33+ in [Cu(BCDC)]PF6.THF - Cartesian Coordinates

===========================================

Cu 2.6872 5.2400 -7.8195

Cu 1.6741 .0000 -.0001

Cu 2.6872 -5.2400 7.8194

N -.0214 1.2539 -.6430

N 1.9547 4.4169 -6.2728

C -1.2457 .4395 -.6295

C -2.5400 1.2667 -.6896

C -3.7794 .4659 -.6229

C .3493 1.8884 -1.8434

C -.0845 1.5102 -3.0942

C .3497 2.1343 -4.2257

C 1.2239 3.2111 -4.1272

C 1.6914 3.6186 -2.8771

C 1.2428 2.9678 -1.7536

C 1.6427 3.8855 -5.3265

H -.3598 2.0783 -.0604

H -1.4499 -.2234 -1.5566

H -2.6587 2.0353 .1408

H -2.6332 1.8728 -1.6450

H -4.0252 -.1412 -1.5395

H -4.6924 1.1424 -.5252

H -.9428 .8041 -3.2740

H -.1170 1.8221 -5.1923

H 2.3066 4.5406 -2.7483

H 1.4110 3.5778 -.8259

N -.0214 -1.2539 .6429

N 1.9547 -4.4169 6.2727

C -1.2457 -.4395 .6294

C -2.5400 -1.2667 .6895

C -3.7794 -.4659 .6228

C .3493 -1.8884 1.8433

C -.0845 -1.5102 3.0941

C .3497 -2.1343 4.2256

C 1.2239 -3.2111 4.1271

C 1.6914 -3.6186 2.8770

C 1.2428 -2.9678 1.7535

C 1.6427 -3.8855 5.3264

H -.3599 -2.0783 .0613

H -1.4498 .2222 1.5564

H -2.6587 -2.0353 -.1408

H -2.6332 -1.8728 1.6450

H -4.0252 .1414 1.5396

H -4.6924 -1.1425 .5252

H -.9428 -.8041 3.2740

H -.1170 -1.8221 5.1923

H 2.3061 -4.5404 2.7483

H 1.4110 -3.5778 .8259

BCDC in [Ag(BCDC)]ClO4 - Cartesian Coordinates

====================================

N 5.242 -0.991 -2.9151

N -1.1001 0.529 -1.3475

H -1.2247 1.4846 -1.0864

N -0.8194 -0.7866 1.2734

H -0.6485 -1.7448 1.0532

N 4.7645 2.5688 2.8695

C 4.1815 -0.7677 -2.6019

C 2.8321 -0.474 -2.2291

C 1.8663 -1.4742 -2.2024

H 2.1462 -2.5142 -2.4409

C 0.5662 -1.1762 -1.874

H -0.1756 -1.9891 -1.8579

C 0.1877 0.1525 -1.5991

C 1.1854 1.1302 -1.637

H 0.9232 2.1824 -1.415

C 2.4747 0.8429 -1.9314

H 3.2417 1.6355 -1.9437

C -2.131 -0.347 -0.7819

H -1.9318 -1.4067 -1.1203

C -3.4925 0.0613 -1.3182

H -3.5086 -0.0643 -2.4335

H -3.6862 1.1461 -1.1009

C -4.6153 -0.7641 -0.7085

H -5.5988 -0.3771 -1.0801

H -4.5215 -1.8313 -1.0399

C -4.581 -0.7019 0.813

H -4.7968 0.3489 1.1445

H -5.3851 -1.3599 1.2348

C -3.2393 -1.1405 1.3412

H -3.0857 -2.2261 1.0929

H -3.2357 -1.0549 2.4613

C -2.1003 -0.3102 0.7695

H -2.2484 0.7587 1.108

C 0.2898 -0.0365 1.5411

C 1.516 -0.684 1.6273

H 1.5833 -1.7717 1.4387

C 2.6709 -0.012 1.9062

H 3.6381 -0.5392 1.9334

C 2.6058 1.3557 2.1904

C 1.3915 2.0169 2.1344

H 1.3415 3.0955 2.3587

C 0.2423 1.3362 1.8022

H -0.7081 1.8903 1.7625

C 3.8027 2.0493 2.5564

BCDC(Ag)22+ in [Ag(BCDC)]ClO4 - Cartesian Coordinates

========================================

Ag 6.8588 -1.1868 -3.0066

Ag 6.2726 2.9744 3.3637

N 4.7622 -1.0752 -2.9022

N -1.5799 0.4448 -1.3346

H -1.8385 1.4064 -1.3715

N -1.2992 -0.8708 1.2863

H -1.251 -1.8652 1.3574

N 4.2847 2.4846 2.8824

C 3.7017 -0.8519 -2.589

C 2.3523 -0.5582 -2.2162

C 1.3865 -1.5584 -2.1895

H 1.5525 -2.6154 -2.4788

C 0.0864 -1.2604 -1.8611

H -0.6936 -2.0516 -1.8899

C -0.2921 0.0683 -1.5862

C 0.7056 1.046 -1.6241

H 0.3686 2.0997 -1.4966

C 1.9949 0.7587 -1.9185

H 2.6447 1.634 -2.0595

C -2.6108 -0.4312 -0.769

H -2.4599 -1.5013 -1.107

C -3.9723 -0.0229 -1.3053

H -4.0226 -0.1542 -2.421

H -4.2052 1.0573 -1.0942

C -5.0951 -0.8483 -0.6956

H -6.0855 -0.4485 -1.0543

H -5.0513 -1.9156 -1.0358

C -5.0608 -0.7861 0.8259

H -5.3272 0.2485 1.1689

H -5.8668 -1.4618 1.2326

C -3.7191 -1.2247 1.3541

H -3.605 -2.3178 1.1083

H -3.7513 -1.1449 2.476

C -2.5801 -0.3944 0.7824

H -2.7792 0.6694 1.1182

C -0.19 -0.1207 1.554

C 1.0362 -0.7682 1.6402

H 1.0276 -1.8766 1.5418

C 2.1911 -0.0962 1.9191

H 3.0694 -0.7354 2.0677

C 2.126 1.2715 2.2033

C 0.9117 1.9327 2.1473

H 0.7521 2.9998 2.405

C -0.2375 1.252 1.8151

H -1.2175 1.7778 1.8126

C 3.3229 1.9651 2.5693
